# Supplementary material for: Zwitterionic buffer-induced visible light excitation of TiO2 for efficient pollutant photodegradation
Source: Royal Society of Chemistry journal article supplement (doi:10.1039/c6ra02979e), 2016-01-01
Supplement: c6ra02979e1.pdf [file c6ra02979e1.pdf]

**Supplementary material**

**Zwitterionic buffer-induced visible light excitation of TiO<sub>2</sub> for efficient pollutant photodegradation**

Xiang Xiao<sup>a,b</sup>, Wen-Wen Zhu<sup>a</sup>, Yu-Bin Lei<sup>a</sup>, Qiu-yue Liu<sup>a</sup>, Qian Li<sup>a</sup>, Wen-Wei Li<sup>b,\*</sup>

<sup>a</sup>School of the Environment and Safety Engineering, Jiangsu University, Zhenjiang, 212013, China

<sup>b</sup>CAS Key Laboratory of Urban Pollutant Conversion, Department of Chemistry, University of Science & Technology of China, Hefei 230026, China

**\* Corresponding author:**

Dr. Wen-Wei Li, Fax: +86-551-63607453; E-mail: [wwli@ustc.edu.cn](mailto:wwli@ustc.edu.cn);

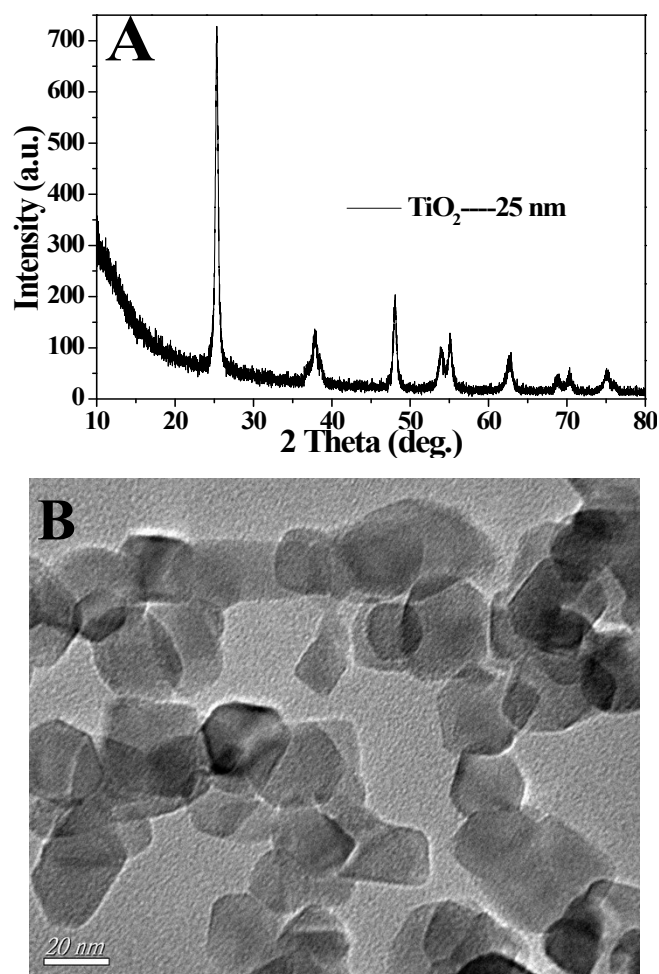

**Fig. S1** XRD patterns (A) and TEM micrograph (B) of TiO<sub>2</sub> used in this study. The crystal phase of the TiO<sub>2</sub> nanoparticles was characterized by X-ray diffraction (XRD) patterns using a D8 instrument (Rigaku Co., Japan) with Cu K radiation ( $\lambda=1.54718$  Å) in the  $2\theta$  range from 10° to 80°. All of the diffraction peaks can be indexed to the cubic phase of anatase (Fig. S1a). The morphology was also observed by using high resolution transmission electron microscopy (HRTEM, JEM-2100, Jeol Co., Japan). The particle size was uniform, about 25-nm in average (Fig. S1b).

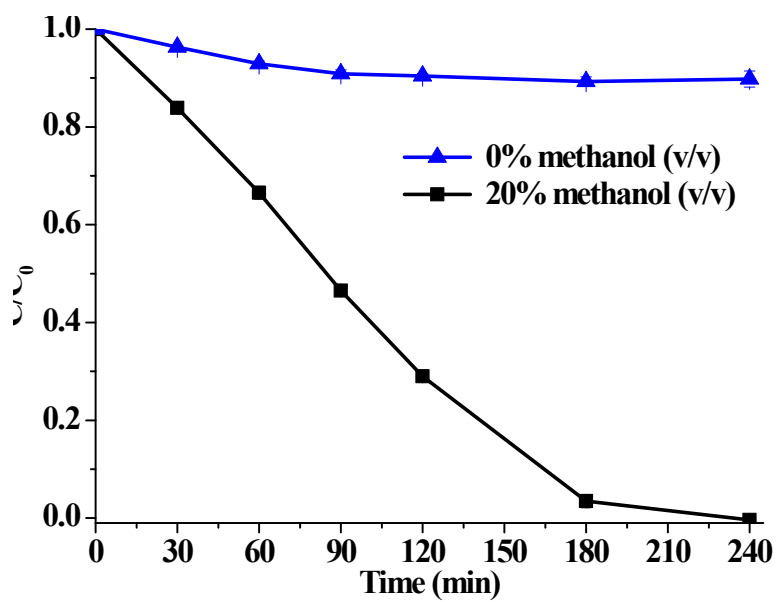

**Fig. S2** Effect of methanol on MO photodegradation via LMCT excitation of TiO<sub>2</sub>

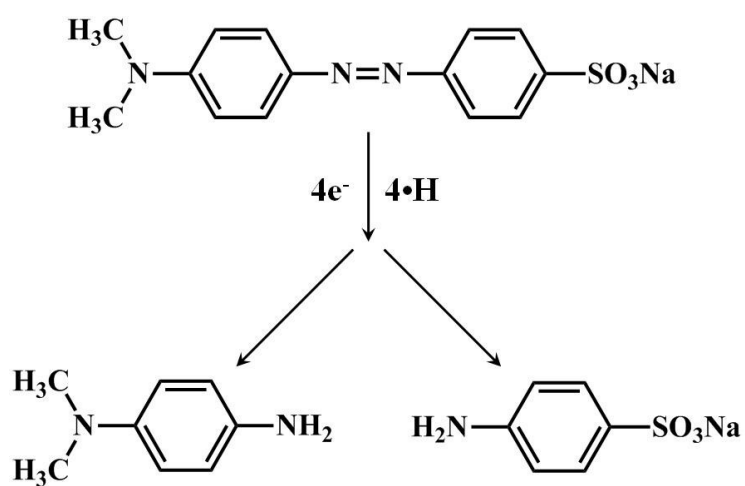

**Fig. S3** Pathway of MO reductive photodegradation by TiO<sub>2</sub>-HEPES complex

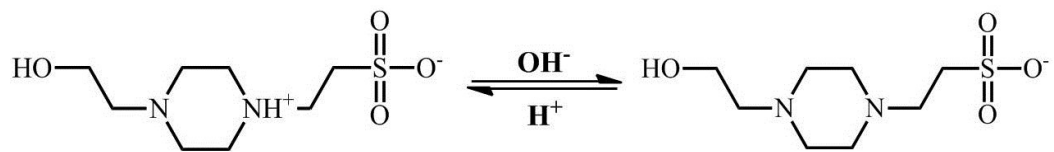

**Fig. S4** Structure of HEPES in response to changing pH.
